# Supplementary material for: Ligand-free copper(i)-catalysed intramolecular direct C–H functionalization of azoles
Source: Royal Society of Chemistry journal article supplement (doi:10.1039/b916549e), 2009-12-23
Supplement: b916549e.pdf [file b916549e.pdf]

# *Supplementary data*

## *Ligand-free Copper(I)-Catalysed Intramolecular Direct C-H Functionalization Of Azaheterocycles*

Nekane Barbero, Raul SanMartin\* and Esther Domínguez\*

*Kimika Organikoa II Saila, Zientzia eta Teknologia Fakultatea, Euskal Herriko  
Unibertsitatea, PO Box 644, 48080 Bilbao, Spain*

Corresponding author, email address: [raul.sanmartin@ehu.es](mailto:raul.sanmartin@ehu.es)

|                                                         |            |
|---------------------------------------------------------|------------|
| <b>Table of Contents</b>                                | <b>S1</b>  |
| <b>General Remarks</b>                                  | <b>S2</b>  |
| <b>General Procedure for the <i>N</i>-benzylation</b>   | <b>S2</b>  |
| <b><sup>1</sup>H-NMR and <sup>13</sup>C-NMR spectra</b> | <b>S11</b> |

---

\* Corresponding author. Tel.: +34 946 015 435; fax: +34 946 012 748; e-mail: raul.sanmartin@ehu.es.

## General Remarks

### General procedures.

All reagents were purchased and used as received. Chemical shifts ( $\delta$ ) are given in ppm downfield from Me<sub>4</sub>Si and refer as internal standard to the residual solvent CDCl<sub>3</sub>: ( $\delta$  = 7.26 for <sup>1</sup>H and 77.0 for <sup>13</sup>C). Coupling constants, *J*, are reported in hertz (Hz). Melting points were determined in a capillary tube and are uncorrected. TLC was carried out on SiO<sub>2</sub>, and the spots were located with UV light. Flash chromatography was carried out on SiO<sub>2</sub>. Drying of organic extracts during work-up of reactions was performed over anhydrous Na<sub>2</sub>SO<sub>4</sub>. Evaporation of solvents was accomplished with a rotatory evaporator.

### General Procedure for the *N*-benzylation<sup>1</sup>

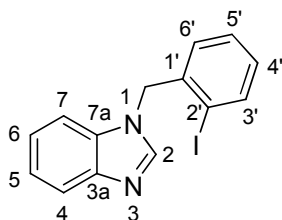

**Preparation of 1-(2-Iodobenzyl)-1*H*-benzo[*d*]imidazole (1a).** Commercial DMSO (13.5 mL) was added to previously crushed KOH (760 mg, 13.5 mmol) and the solution was stirred vigorously for 5 minutes. After adding the benzimidazole (807.7 mg, 6.89 mmol) the mixture was stirred for additional 45 minutes. Then, 2-iodobenzyl bromide (2.5 g, 8.46 mmol) was added and the resulting mixture was stirred for 2 h. The reaction was quenched with distilled water (15 mL) and the aqueous layer was extracted with Et<sub>2</sub>O (3x20 mL). The combined organic layers were washed with distilled H<sub>2</sub>O, and dried over anhydrous Na<sub>2</sub>SO<sub>4</sub>. The solvent was concentrated *in vacuo* and the resulting brown oily residue was redissolved and purified by flash chromatography (AcOEt) affording the title **1a** compound as a white solid. (1.79 g, 78%). Mp 102-104°C; IR<sub>max</sub>(film)/cm<sup>-1</sup> 1202, 1360, 1496, 3048; <sup>1</sup>H NMR (300 MHz, CDCl<sub>3</sub>, SiMe<sub>4</sub>) ( $\delta$ <sub>H</sub>, ppm): 5.29 (s, 2H, CH<sub>2</sub>), 6.68 (d, *J*=7.5 Hz, 1H, H<sub>arom</sub>), 6.97 (apparent t, *J*=7.4 Hz, 1H, H<sub>arom</sub>),

7.15-7.30 (m, 4H, H<sub>arom</sub>), 7.83-7.90 (m, 3H, H<sub>arom</sub>); <sup>13</sup>C-NMR (75 MHz, CDCl<sub>3</sub>, SiMe<sub>4</sub>) (δ<sub>C</sub>, ppm) 53.4 (CH<sub>2</sub>), 97.6 (C<sub>arom</sub>-I), 109.8 (C<sub>7</sub>), 120.3, 122.2, 123.0, 127.8, 128.6, 129.7 (C<sub>arom</sub>-H), 133.6 (C<sub>7a</sub>), 137.5 (C<sub>arom</sub>-C), 139.6 (C<sub>3'</sub>), 143.2 (C<sub>2</sub>), 143.7 (C<sub>1'</sub>); MS-EI (CI) m/z 335 (M+1, 100), 334 (M<sup>+</sup>, 20), 237 (17), 235 (11), 217 (14), 209 (75), 208 (35), 207 (41); HRMS (CI) calculated for C<sub>14</sub>H<sub>12</sub>IN<sub>2</sub> 335.0045, found 335.0036.

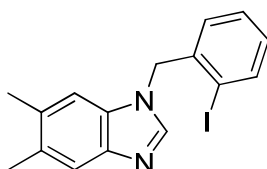

**1-(2-Iodobenzyl)-5,6-dimethyl-1H-benzo[d]imidazole (1b)** (63%): Mp: 120-122°C; IR<sub>max</sub>(film)/cm<sup>-1</sup> 1490, 1432; <sup>1</sup>H NMR (300 MHz, CDCl<sub>3</sub>, SiMe<sub>4</sub>) (δ<sub>H</sub>, ppm): 2.34 (s, 3H, CH<sub>3</sub>), 2.38 (s, 3H, CH<sub>3</sub>), 5.30 (s, 2H, CH<sub>2</sub>), 6.66 (d, *J*=7.7 Hz, 1H, H<sub>arom</sub>), 6.98-7.03 (m, 2H, H<sub>arom</sub>), 7.21 (d, *J*=7.5 Hz, 1H, H<sub>arom</sub>), 7.61 (s, 1H, H<sub>4</sub>, H<sub>7</sub>), 7.82 (s, 1H, H<sub>2</sub>), 7.90 (d, *J*=7.8 Hz, 1H, H<sub>2</sub>); <sup>13</sup>C-NMR (75 MHz, CDCl<sub>3</sub>, SiMe<sub>4</sub>) (δ<sub>C</sub>, ppm) 20.2, 20.5 (CH<sub>3</sub>), 53.5 (CH<sub>2</sub>), 97.4 (C<sub>arom</sub>-I), 110.0 (C<sub>7</sub>), 120.4, 127.8, 128.8, 129.7 (C<sub>arom</sub>-H), 131.3, 132.3, 132.4, 137.8 (C<sub>arom</sub>-C), 139.7 (C<sub>3'</sub>), 142.4 (C<sub>1'</sub>), 142.6 (C<sub>2</sub>); MS-EI (CI) m/z 363 (M+1, 100), 362 (M<sup>+</sup>, 38); HRMS (CI) calculated for C<sub>16</sub>H<sub>16</sub>IN<sub>2</sub> 363.0358, found 363.0341.

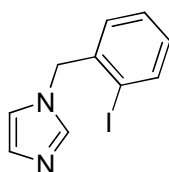

**1-(2-Iodobenzyl)-1H-imidazole (1c)** (66%): Mp: 55-57°C. The experimental data were compared to those reported on the bibliography.<sup>2</sup>

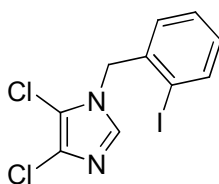

**4,5-Dichloro-1-(2-iodobenzyl)-1H-imidazole (1d)** (33%): Mp: 71-73°C; IR<sub>max</sub>(film)/cm<sup>-1</sup> 1249, 1420, 1473, 1508; <sup>1</sup>H NMR (300 MHz, CDCl<sub>3</sub>, SiMe<sub>4</sub>) (δ<sub>H</sub>, ppm): 5.10 (s, 2H, CH<sub>2</sub>), 6.83 (d, *J*=7.6 Hz, 1H, H<sub>arom</sub>), 7.05 (apparent t, *J*=7.6 Hz, 1H, H<sub>arom</sub>), 7.32-7.37 (m, 2H, H<sub>arom</sub>), 7.90 (d, *J*=7.9 Hz, 1H, H<sub>3'</sub>); <sup>13</sup>C-NMR (75 MHz, CDCl<sub>3</sub>, SiMe<sub>4</sub>) (δ<sub>C</sub>, ppm) 54.4 (CH<sub>2</sub>), 97.8 (C<sub>arom</sub>-I), 113.7, 16.5 (C<sub>arom</sub>-Cl), 128.2, 129.0, 130.2, 134.6 (C<sub>arom</sub>-H), 136.6 (C<sub>1'</sub>), 139.9 (C<sub>2</sub>); HRMS (CI) calculated for C<sub>10</sub>H<sub>8</sub>ICl<sub>2</sub>N<sub>2</sub> 352.9109, found 352.9097.

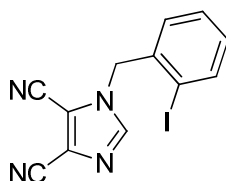

**1-(2-Iodobenzyl)-1H-imidazole-4,5-dicarbonitrile (1e)** (48%): Mp: 172-174°C; IR<sub>max</sub>(film)/cm<sup>-1</sup> 1414, 1525, 1672, 2226; <sup>1</sup>H NMR (300 MHz, DMSO-d<sub>6</sub>, SiMe<sub>4</sub>) (δ<sub>H</sub>, ppm): 5.45 (s, 2H, CH<sub>2</sub>), 6.57 (d, *J*=7.0 Hz, 1H, H<sub>arom</sub>), 7.06-7.11 (m, 1H, H<sub>arom</sub>), 7.33-7.39 (m, 1H, H<sub>arom</sub>), 7.90-7.95 (m, 1H, H<sub>arom</sub>), 8.06 (s, 1H, H<sub>2</sub>); <sup>13</sup>C-NMR (75 MHz, DMSO-d<sub>6</sub>, SiMe<sub>4</sub>) (δ<sub>C</sub>, ppm) 54.1 (CH<sub>2</sub>), 97.7 (C<sub>arom</sub>-I), 113.8, 114.4 (C≡N) 127.1, 128.8, 129.8 (C<sub>arom</sub>-H), 134.5, 138.3 (C<sub>arom</sub>-C), 139.3 (C<sub>arom</sub>-H), 142.0 (C<sub>2</sub>), 159.2 (C<sub>arom</sub>-C); MS-EI (CI) m/z 335 (M+1, 5), 286 (100), 266 (32), 217 (12); HRMS (CI) calculated for C<sub>12</sub>H<sub>8</sub>IN<sub>4</sub> 334.9794, found 334.9794.

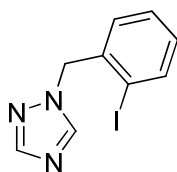

**1-(2-Iodobenzyl)-1H-1,2,4-triazole (1f)** (56%): Mp: 59-61°C; IR<sub>max</sub>(film)/cm<sup>-1</sup> 1014, 1132, 1273, 1502, 3131; <sup>1</sup>H NMR (300 MHz, CDCl<sub>3</sub>, SiMe<sub>4</sub>) (δ<sub>H</sub>, ppm): 5.31 (s, 2H, CH<sub>2</sub>), 6.91 (apparent dt, *J*=7.8, 7.7, 1.6 Hz, 1H, H<sub>arom</sub>), 7.0 (dd, *J*=7.7, 1.4 Hz, 1H, H<sub>arom</sub>), 7.24 (apparent dt, *J*=7.6, 7.5, 1.1 Hz, 1H, H<sub>arom</sub>), 7.77 (dd, *J*=7.9, 1.1 Hz, 1H, H<sub>arom</sub>), 7.89 (s, 1H, H<sub>3</sub>), 8.09 (s, 1H, H<sub>5</sub>); <sup>13</sup>C-NMR (75 MHz, CDCl<sub>3</sub>, SiMe<sub>4</sub>) (δ<sub>C</sub>, ppm) 57.5 (CH<sub>2</sub>), 98.4

(C<sub>arom-I</sub>), 128.6, 129.4, 130.0 (C<sub>arom-H</sub>), 136.7 (C<sub>1'</sub>), 139.5 (C<sub>3'</sub>), 143.4 (C<sub>5</sub>), 151.9 (C<sub>3</sub>); HRMS (CI) calculated for C<sub>9</sub>H<sub>9</sub>IN<sub>3</sub> 285.9841, found 285.9841.

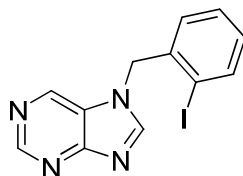

**1-(2-Iodobenzyl)-1H-1,2,4-triazole (1h)** (32%): Mp: 101-103°C; IR<sub>max</sub>(film)/cm<sup>-1</sup> 1702, 1508, 1443, 1361, 1190; <sup>1</sup>H NMR (300 MHz, CDCl<sub>3</sub>, SiMe<sub>4</sub>) (δ<sub>H</sub>, ppm): 5.49 (s, 2H, CH<sub>2</sub>), 6.99-7.04 (m, 1H, H<sub>arom</sub>), 7.15-7.18 (m, 1H, H<sub>arom</sub>), 7.28 (apparent t, *J*=7.8 Hz, 1H, H<sub>arom</sub>), 7.87 (d, *J*=7.9 Hz, 1H, H<sub>arom</sub>), 8.14 (s, 1H, H<sub>2</sub>), 8.98 (s, 1H, H<sub>5</sub>), 9.13 (s, 1H, H<sub>7</sub>); <sup>13</sup>C-NMR (75 MHz, CDCl<sub>3</sub>, SiMe<sub>4</sub>) (δ<sub>C</sub>, ppm) 51.7 (CH<sub>2</sub>), 98.7 (C<sub>arom-I</sub>), 128.9, 129.6, 130.3 (C<sub>arom-H</sub>), 133.7, 137.1 (C<sub>arom-C</sub>), 139.9 (C<sub>3'</sub>), 145.0 (C<sub>7</sub>), 148.7 (C<sub>2</sub>), 151.4 (C<sub>3a</sub>), 152.7 (C<sub>5</sub>); MS-EI (CI) *m/z* 338 (M+2, 13), 337 (M+1, 100), 217 (10), 209 (21); HRMS (CI) calculated for C<sub>12</sub>H<sub>10</sub>IN<sub>4</sub> 336.9950, found 336.9939.

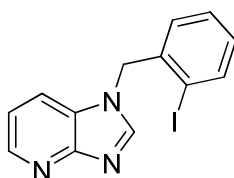

**1-(2-Iodobenzyl)-1H-imidazo[4,5-*b*]pyridine (1i)** (35%): Mp: 120-122°C (from hexane); IR<sub>max</sub>(KBr)/cm<sup>-1</sup> 1191, 1279, 1396, 1484; <sup>1</sup>H NMR (300 MHz, CDCl<sub>3</sub>, SiMe<sub>4</sub>) (δ<sub>H</sub>, ppm): 5.48 (s, 2H, CH<sub>2</sub>), 6.92-7.01 (m, 2H, H<sub>arom</sub>), 7.18-7.24 (m, 2H, H<sub>arom</sub>), 7.83 (d, *J*=7.8 Hz, 1H, H<sub>arom</sub>), 8.04-8.07 (m, 2H, H<sub>arom</sub>), 8.37-8.39 (m, 1H, H<sub>arom</sub>); <sup>13</sup>C NMR (75 MHz, CDCl<sub>3</sub>, SiMe<sub>4</sub>) (δ<sub>C</sub>, ppm): 51.6 (CH<sub>2</sub>), 98.3 (C<sub>arom-I</sub>), 118.3, 127.9, 128.6, 128.9, 129.8 (C<sub>arom-H</sub>), 135.0, 137.9 (C<sub>arom-C</sub>), 139.6, 143.8, 144.4 (C<sub>arom-H</sub>), 146.9 (C<sub>arom-C</sub>); MS (CI) *m/z*: 337 (M+2, 14), 336 (M+1, 100), 282 (18, 11), 208 (43). HRMS (CI) [M+1]: calculated for C<sub>13</sub>H<sub>11</sub>N<sub>3</sub>I, 335.9998; found, 335.9982.

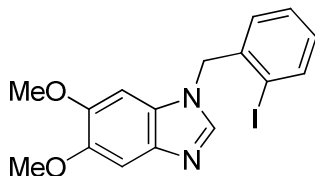

**1-(2-Iodobenzyl)-5,6-dimethoxy-1H-benzo[d]imidazole (1k)** (75%): Mp: 158-161°C (from hexane); IR<sub>max</sub>(KBr)/cm<sup>-1</sup> 3072, 1490, 1237; <sup>1</sup>H NMR (300 MHz, CDCl<sub>3</sub>, SiMe<sub>4</sub>) (δ<sub>H</sub>, ppm): 3.74 (s, 3H, OCH<sub>3</sub>), 3.83 (s, 3H, OCH<sub>3</sub>), 5.17 (s, 2H, CH<sub>2</sub>), 6.61 (s, 2H, H<sub>arom</sub>), 6.89 (apparent t, *J*=7.2 Hz, 1H, H<sub>arom</sub>), 7.10 (apparent t, *J*=7.3 Hz, 1H, H<sub>arom</sub>), 7.21 (s, 1H, H<sub>arom</sub>), 7.69 (s, 1H, H<sub>arom</sub>), 7.78 (d, *J*=7.7 Hz, 1H, H<sub>arom</sub>); <sup>13</sup>C NMR (75 MHz, CDCl<sub>3</sub>, SiMe<sub>4</sub>) (δ<sub>C</sub>, ppm): 53.2 (CH<sub>2</sub>), 55.9, 56.0 (OCH<sub>3</sub>), 92.5 (C<sub>arom</sub>-H), 97.4 (C<sub>arom</sub>-C), 101.9 (C<sub>arom</sub>-H), 127.2 (C<sub>arom</sub>-C), 127.6, 128.5, 129.5, (C<sub>arom</sub>-H), 136.9, 137.3 (C<sub>arom</sub>-C), 139.3, 141.4 (C<sub>arom</sub>-H), 146.5, 147.3 (C<sub>arom</sub>-OCH<sub>3</sub>); MS (CI) *m/z*: 395 (M+1, 100), 394 (M<sup>+</sup>, 51), 269 (24). HRMS (CI) [M+1]: calculated for C<sub>16</sub>H<sub>16</sub>IN<sub>2</sub>O<sub>2</sub>, 395.0257; found, 395.0245.

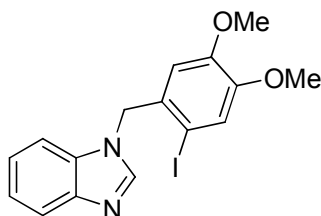

**1-(2-Iodo-4,5-dimethoxybenzyl)-1H-benzo[d]imidazole (1l)** (82%): Mp: 136-138°C (from hexane); IR<sub>max</sub>(KBr)/cm<sup>-1</sup> 1496, 1255, 1202; <sup>1</sup>H NMR (300 MHz, CDCl<sub>3</sub>, SiMe<sub>4</sub>) (δ<sub>H</sub>, ppm): 3.60 (s, 3H, OCH<sub>3</sub>), 3.87 (s, 3H, OCH<sub>3</sub>), 5.32 (s, 2H, CH<sub>2</sub>), 6.38 (s, 1H, H<sub>arom</sub>), 7.26-7.32 (m, 4H, H<sub>arom</sub>), 7.82-7.85 (m, 1H, H<sub>arom</sub>), 7.92 (s, 1H, H<sub>arom</sub>); <sup>13</sup>C NMR (75 MHz, CDCl<sub>3</sub>, SiMe<sub>4</sub>) (δ<sub>C</sub>, ppm): 53.3 (CH<sub>2</sub>), 55.7, 56.1 (OCH<sub>3</sub>), 86.3 (C<sub>arom</sub>-I), 110.0, 111.3, 120.3, 121.8, 122.3, 123.1 (C<sub>arom</sub>-H), 129.6, 133.7 (C<sub>arom</sub>-C), 143.0 (C<sub>arom</sub>-H), 143.7, 149.4, 149.7 (C<sub>arom</sub>-C); MS (CI) *m/z*: 395 (M+1, 46), 394 (M<sup>+</sup>, 27), 277 (100), 268 (25). HRMS (CI) [M+1]: calculated for C<sub>16</sub>H<sub>16</sub>N<sub>2</sub>O<sub>2</sub>I, 395.0257; found, 395.0242.

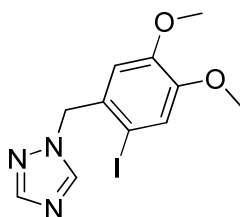

**1-(2-Iodo-4,5-dimethoxybenzyl)-1H-1,2,4-triazole (1m)** (17%): Mp: 101-103°C (from hexane); IR  $\text{max(KBr)/cm}^{-1}$  3566, 1504, 1262, 1210, 1158;  $^1\text{H NMR}$  (300 MHz,  $\text{CDCl}_3$ ,  $\text{SiMe}_4$ ) ( $\delta_{\text{H}}$ , ppm): 3.73, 3.79 ( $\text{OCH}_3$ ), 5.28 (s, 2H,  $\text{CH}_2$ ), 6.71 (s, 1H,  $\text{H}_{\text{arom}}$ ), 7.18 (s, 1H,  $\text{H}_{\text{arom}}$ ), 7.90 (s, 1H,  $\text{H}_{\text{arom}}$ ), 8.08 (s, 1H,  $\text{H}_{\text{arom}}$ );  $^{13}\text{C NMR}$  (75 MHz,  $\text{CDCl}_3$ ,  $\text{SiMe}_4$ ) ( $\delta_{\text{C}}$ , ppm): 55.7, 56.0 ( $\text{OCH}_3$ ), 57.5 ( $\text{CH}_2$ ), 87.2 ( $\text{C}_{\text{arom-C}}$ ), 112.6, 121.5 ( $\text{C}_{\text{arom-H}}$ ), 129.0 ( $\text{C}_{\text{arom-C}}$ ), 143.2 ( $\text{C}_{\text{arom-H}}$ ), 149.53, 149.58 ( $\text{C}_{\text{arom-OCH}_3}$ ), 151.9 ( $\text{C}_{\text{arom-H}}$ ); MS (CI)  $m/z$ : 346 ( $\text{M}+1$ , 10), 345 ( $\text{M}^+$ , 5), 277 (100). HRMS (CI) [ $\text{M}+1$ ]: calculated for  $\text{C}_{11}\text{H}_{13}\text{IN}_3\text{O}_2$ , 346.0053; found, 346.0039.

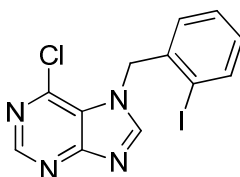

**6-Chloro-7-(2-iodobenzyl)-7H-purine** (31%): Mp: 89-91°C (from hexane); IR  $\text{max(KBr)/cm}^{-1}$  1570, 1561, 1437, 1337, 1173;  $^1\text{H NMR}$  (300 MHz,  $\text{CDCl}_3$ ,  $\text{SiMe}_4$ ) ( $\delta_{\text{H}}$ , ppm): 5.49 (s, 2H,  $\text{CH}_2$ ), 7.06 (apparent t,  $J=7.3$  Hz, 1H,  $\text{H}_{\text{arom}}$ ), 7.19 (d,  $J=7.1$  Hz, 1H,  $\text{H}_{\text{arom}}$ ), 7.30 (apparent t,  $J=7.4$  Hz, 1H,  $\text{H}_{\text{arom}}$ ), 7.87 (d,  $J=7.8$  Hz, 1H,  $\text{H}_{\text{arom}}$ ), 8.11 (s, 1H,  $\text{H}_{\text{arom}}$ ), 8.74 (s, 1H,  $\text{H}_{\text{arom}}$ );  $^{13}\text{C NMR}$  (75 MHz,  $\text{CDCl}_3$ ,  $\text{SiMe}_4$ ) ( $\delta_{\text{C}}$ , ppm): 52.5 ( $\text{CH}_2$ ), 98.8 ( $\text{C}_{\text{arom-I}}$ ), 129.0, 129.9, 130.6 ( $\text{C}_{\text{arom-H}}$ ), 131.4, 136.8 ( $\text{C}_{\text{arom-C}}$ ), 140.1, 145.1 ( $\text{C}_{\text{arom-H}}$ ), 151.1, 151.9 ( $\text{C}_{\text{arom-C}}$ ), 152.1 ( $\text{C}_{\text{arom-H}}$ ); MS (CI)  $m/z$ : 371 ( $\text{M}+1$ , 100), 335 (13), 243 (38), 217 (30). HRMS (CI) [ $\text{M}+1$ ]: calculated for  $\text{C}_{12}\text{H}_9\text{N}_4\text{ICl}$ , 370.9561; found, 370.9544.

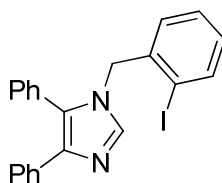

**1-(2-Iodobenzyl)-4,5-diphenyl-1H-imidazole (1j)** (65%): Mp: 92-94°C (from hexane); IR  $\text{max(KBr)/cm}^{-1}$  1484, 1437, 1331, 1231;  $^1\text{H NMR}$  (300 MHz,  $\text{CDCl}_3$ ,  $\text{SiMe}_4$ ) ( $\delta_{\text{H}}$ , ppm): 4.96 (s, 2H,  $\text{CH}_2$ ), 6.76 (d,  $J=7.6$  Hz, 1H,  $\text{H}_{\text{arom}}$ ), 6.96 (apparent t,  $J=7.6$  Hz, 1H,  $\text{H}_{\text{arom}}$ ), 7.12-7.29 (m, 6H,  $\text{H}_{\text{arom}}$ ), 7.34-7.38 (m, 3H,  $\text{H}_{\text{arom}}$ ), 7.54 (d,  $J=7.1$  Hz, 2H,  $\text{H}_{\text{arom}}$ ), 7.59 (s, 1H,  $\text{H}_{\text{arom}}$ ), 7.79 (d,  $J=7.9$  Hz, 1H,  $\text{H}_{\text{arom}}$ );  $^{13}\text{C NMR}$  (75 MHz,  $\text{CDCl}_3$ ,  $\text{SiMe}_4$ ) ( $\delta_{\text{C}}$ , ppm): 53.6 ( $\text{CH}_2$ ), 97.3 ( $\text{C}_{\text{arom-I}}$ ), 126.3, 126.4, 127.9, 128.0, 128.64, 128.69, 128.9, 129.5 ( $\text{C}_{\text{arom-H}}$ ), 130.0 ( $\text{C}_{\text{arom-C}}$ ), 130.6 ( $\text{C}_{\text{arom-H}}$ ), 134.3 ( $\text{C}_{\text{arom-C}}$ ), 137.1 ( $\text{C}_{\text{arom-H}}$ ), 138.3, 138.7 ( $\text{C}_{\text{arom-C}}$ ), 139.4 ( $\text{C}_{\text{arom-H}}$ ); MS (CI)  $m/z$ : 438 (M+2, 22), 437 (M+1, 100), 436 ( $\text{M}^+$ , 42), 311 (20), 310 (19), 309 (38), 308 (18). HRMS (CI) [M+1]: calculated for  $\text{C}_{22}\text{H}_{18}\text{N}_2\text{I}$ , 437.0515; found, 437.0500. Found C 57.5, H 3.9, N 6.0%. Calculated for  $\text{C}_{22}\text{H}_{17}\text{N}_2\text{I}$ : C 60.5, H 3.9, N 6.4.

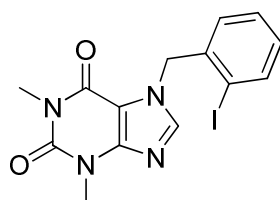

**7-(2-Iodobenzyl)-1,3-dimethyl-1H-purine-2,6(3H,7H)-dione (1p)** (19%): Mp: 171-173°C (from hexane); IR  $\text{max(KBr)/cm}^{-1}$  1649, 1543, 1461, 1226;  $^1\text{H NMR}$  (300 MHz,  $\text{CDCl}_3$ ,  $\text{SiMe}_4$ ) ( $\delta_{\text{H}}$ , ppm): 3.38 (s, 3H,  $\text{CH}_3$ ), 3.57 (s, 3H,  $\text{CH}_3$ ), 5.56 (s, 2H,  $\text{CH}_2$ ), 7.02 (apparent t,  $J=7.5$  Hz, 1H,  $\text{H}_{\text{arom}}$ ), 7.15 (d,  $J=7.4$  Hz, 1H,  $\text{H}_{\text{arom}}$ ), 7.31 (apparent t,  $J=7.45$  Hz, 1H,  $\text{H}_{\text{arom}}$ ), 7.60 (s, 1H,  $\text{H}_{\text{arom}}$ ), 7.87 (d,  $J=7.8$  Hz, 1H,  $\text{H}_{\text{arom}}$ );  $^{13}\text{C NMR}$  (75 MHz,  $\text{CDCl}_3$ ,  $\text{SiMe}_4$ ) ( $\delta_{\text{C}}$ , ppm): 27.9, 29.7 ( $\text{CH}_3$ ), 54.5 ( $\text{CH}_2$ ), 98.6, 106.9 ( $\text{C}_{\text{arom-C}}$ ), 128.9, 129.3, 130.2 ( $\text{C}_{\text{arom-H}}$ ), 137.6 ( $\text{C}_{\text{arom-C}}$ ), 139.9, 141.1 ( $\text{C}_{\text{arom-H}}$ ), 148.7, 151.5, 155.1 ( $\text{C}_{\text{arom-C}}$ ); MS (CI)  $m/z$ : 398 (M+2, 16), 397 (M+1, 100), 396 ( $\text{M}^+$ , 13), 269 (21). HRMS (CI) [M+1]: calculated for  $\text{C}_{14}\text{H}_{14}\text{N}_4\text{I}$ , 397.0162; found, 397.0153.

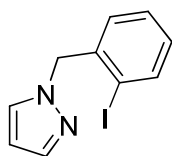



**1-(2-iodobenzyl)-1H-pyrazole (1g)** (96%): Mp: 83-85°C (from hexane);  $^1\text{H}$  NMR (300 MHz,  $\text{CDCl}_3$ ,  $\text{SiMe}_4$ ) ( $\delta_{\text{H}}$ , ppm): 6.29 (s, 2H,  $\text{CH}_2$ ), 6.24 (apparent t,  $J=2.1$  Hz, 1H,  $\text{H}_{\text{arom}}$ ), 6.78 (d,  $J=7.7$  Hz, 1H,  $\text{H}_{\text{arom}}$ ), 6.89 (apparent dt,  $J=7.8$ , 1.6 Hz, 1H,  $\text{H}_{\text{arom}}$ ), 7.19 (apparent dt,  $J=7.6$ , 1.1 Hz, 1H,  $\text{H}_{\text{arom}}$ ), 7.39 (d,  $J=2.1$  Hz, 1H,  $\text{H}_{\text{arom}}$ ), 7.54 (d,  $J=1.3$  Hz, 1H,  $\text{H}_{\text{arom}}$ ), 7.72 (dd,  $J=7.9$ , 1.0 Hz, 1H,  $\text{H}_{\text{arom}}$ );  $^{13}\text{C}$  NMR (75 MHz,  $\text{CDCl}_3$ ,  $\text{SiMe}_4$ ) ( $\delta_{\text{C}}$ , ppm): 59.8 ( $\text{CH}_2$ ), 97.7 ( $\text{C}_{\text{arom-I}}$ ), 105.6, 128.3, 128.4, 129.1, 129.5 ( $\text{C}_{\text{arom-H}}$ ), 138.8 ( $\text{C}_{\text{arom-C}}$ ), 138.9, 139.4 ( $\text{C}_{\text{arom-H}}$ ).

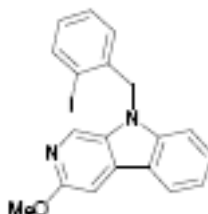

***N*-(2-Iodobenzyl)-5-methoxy-1H-indolo[2,3-*c*]pyridine (1o)** (78%): Mp: 68-70°C (from hexane); IR  $_{\text{max}}(\text{KBr})/\text{cm}^{-1}$  1492, 1241;  $^1\text{H}$  NMR (300 MHz,  $\text{CDCl}_3$ ,  $\text{SiMe}_4$ ) ( $\delta_{\text{H}}$ , ppm): .93 (s, 3H,  $\text{OCH}_3$ ), 5.27 (s, 2H,  $\text{CH}_2$ ), 6.41 (d,  $J=3.0$  Hz, 1H,  $\text{H}_3$ ), 6.63 (d,  $J=7.7$  Hz, 1H,  $\text{H}_{\text{arom}}$ ), 6.91-6.98 (m, 2H,  $\text{H}_{\text{arom}}$ ), 7.15-7.19 (m, 2H,  $\text{H}_{\text{arom}}$ ), 7.85 (d,  $J=7.1$  Hz, 1H,  $\text{H}_{3'}$ ), 8.20 (s, 1H,  $\text{H}_7$ );  $^{13}\text{C}$  NMR (75 MHz,  $\text{CDCl}_3$ ,  $\text{SiMe}_4$ ) ( $\delta_{\text{C}}$ , ppm): 53.9 ( $\text{OCH}_3$ ), 55.3 ( $\text{CH}_2$ ), 97.4 ( $\text{C}_{\text{arom-I}}$ ), 97.8 ( $\text{C}_3$ ,  $\text{C}_4$ ), 100.4 ( $\text{C}_4$ ,  $\text{C}_3$ ), 127.8, 128.6, 128.8, 129.5 ( $\text{C}_{\text{arom-H}}$ ), 130.6 ( $\text{C}_{\text{arom-C}}$ ), 133.7 ( $\text{C}_7$ ), 137.7, 138.6 ( $\text{C}_{\text{arom-C}}$ ), 139.5 ( $\text{C}_{3'}$ ), 158.2 ( $\text{C}_{\text{arom-OCH}_3}$ ); MS (CI)  $m/z$ : 366 ( $\text{M}+2$ , 16), 365 ( $\text{M}+1$ , 100), 364 (46). HRMS (CI) [ $\text{M}+1$ ]: calculated for  $\text{C}_{15}\text{H}_{14}\text{IN}_2\text{O}$ , 365.0151; found, 365.0140.

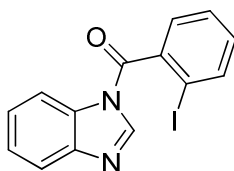

***H*-Benzo[*d*]imidazol-1-yl(2-iodophenyl)methanone (1n)** (35%): Mp: 120-122°C (from hexane); IR  $_{\text{max}}(\text{KBr})/\text{cm}^{-1}$  1191, 1279, 1396, 1484;  $^1\text{H}$  NMR (300 MHz,  $\text{CDCl}_3$ ,  $\text{SiMe}_4$ ) ( $\delta_{\text{H}}$ , ppm): 7.24 (apparent t,  $J=7.4$  Hz, 1H,  $\text{H}_{\text{arom}}$ ), 7.37-7.52 (m, 4H,  $\text{H}_{\text{arom}}$ ), 7.76-7.79 (m, 1H,  $\text{H}_{\text{arom}}$ ), 7.85 (bs, 1H,  $\text{H}_{\text{arom}}$ ), 7.92 (d,  $J=7.9$  Hz, 1H,  $\text{H}_{\text{arom}}$ ), 8.11 (d,  $J=4.7$  Hz,

$^1\text{H}$ ,  $\text{H}_{\text{arom}}$ );  $^{13}\text{C}$  NMR (75 MHz,  $\text{CDCl}_3$ ,  $\text{SiMe}_4$ ) ( $\delta_{\text{C}}$ , ppm): 92.3 ( $\text{C}_{\text{arom-I}}$ ), 115.3, 120.4, 125.4, 125.8, 128.3, 128.6 ( $\text{C}_{\text{arom-H}}$ ), 131.1 ( $\text{C}_{\text{arom-C}}$ ), 132.3 ( $\text{C}_{\text{arom-H}}$ ), 139.1 ( $\text{C}_{\text{arom-C}}$ ), 139.7, 142.5 ( $\text{C}_{\text{arom-H}}$ ), 144.1, 166.4 ( $\text{C}_{\text{arom-C}}$ ); MS (CI)  $m/z$ : 349 ( $\text{M}+1$ , 100), 348 ( $\text{M}^+$ , 21), 231 (86). HRMS (CI) [ $\text{M}+1$ ]: calculated for  $\text{C}_{14}\text{H}_{10}\text{N}_2\text{OI}$ , 348.9838; found, 348.9823.

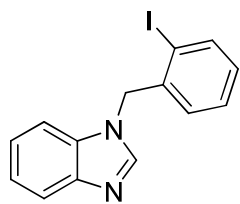

1-(2-Iodobenzyl)-1*H*-benzo[*d*]imidazole

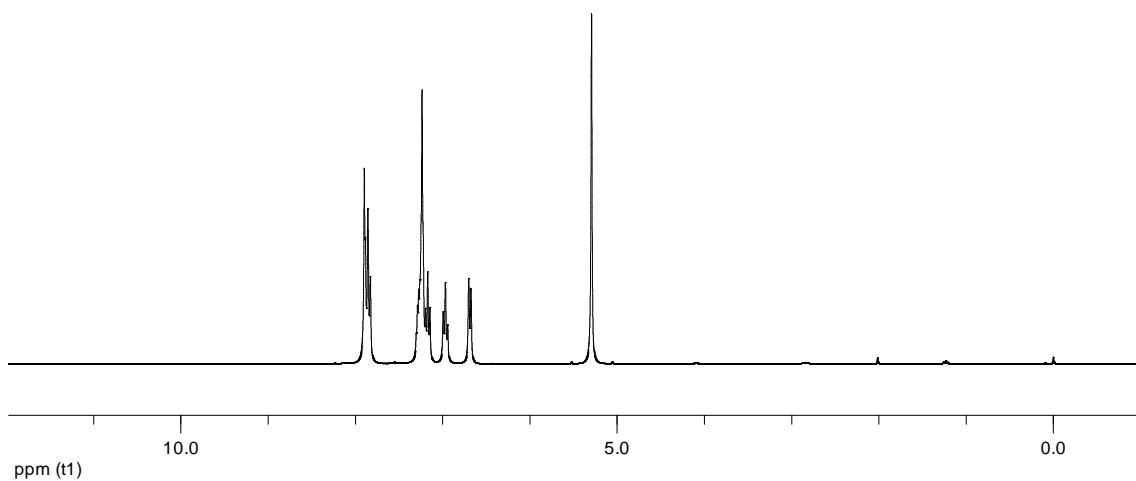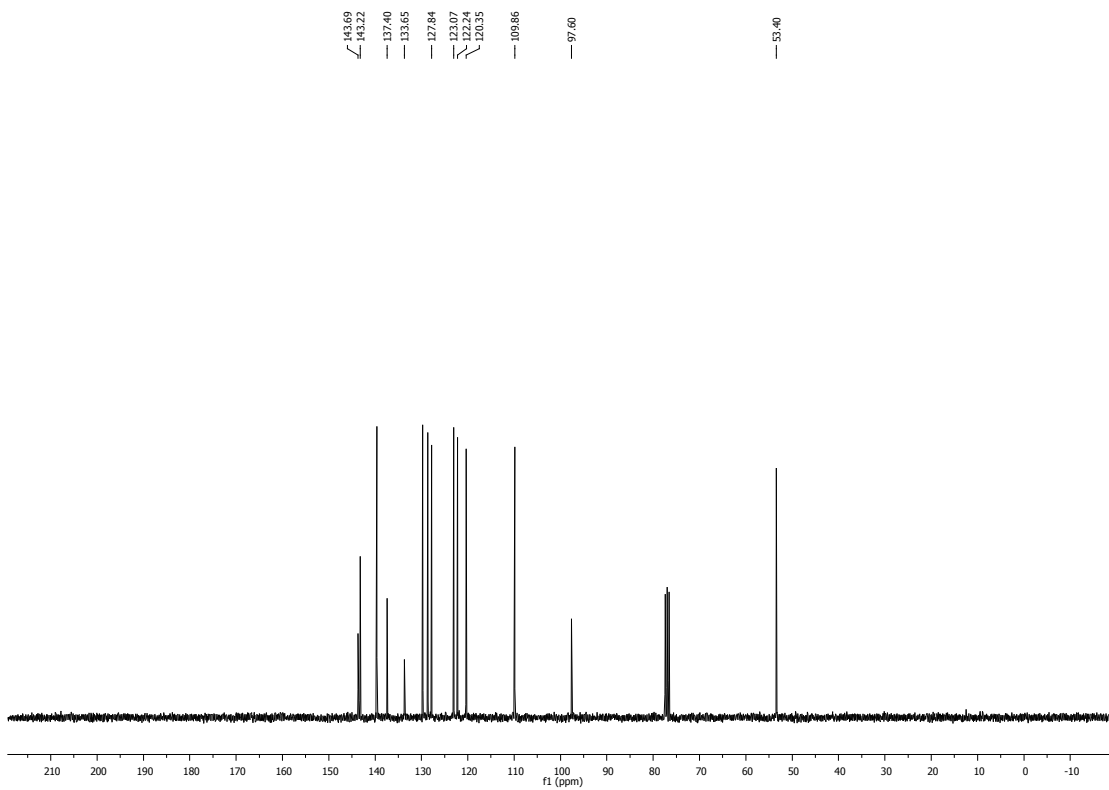

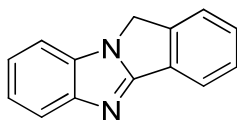

**11*H*-Isoindolo[2,1-*a*]benzimidazole**

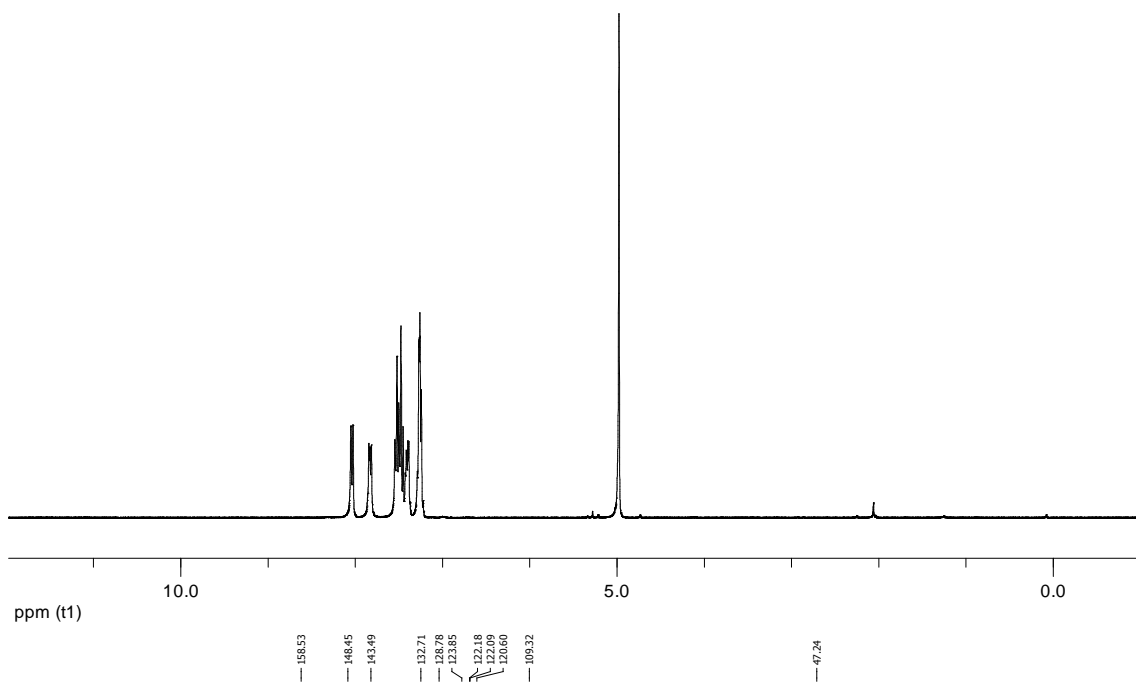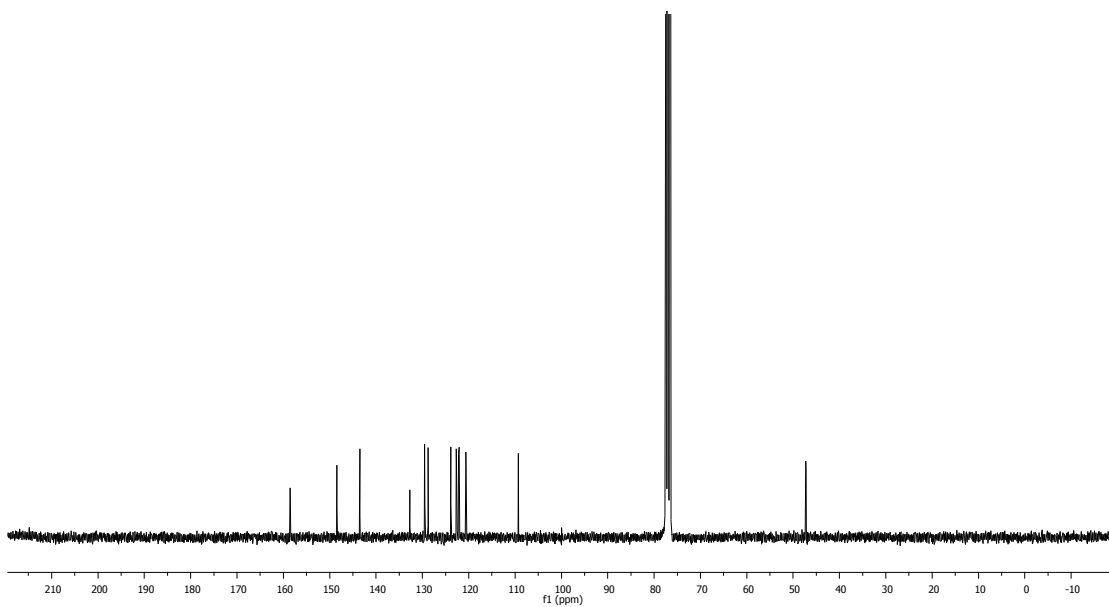

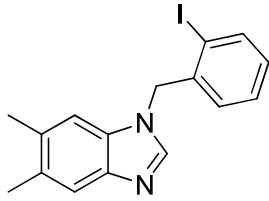

**1-(2-Iodobenzyl)-5,6-dimethyl-1H-benzo[d]imidazole**

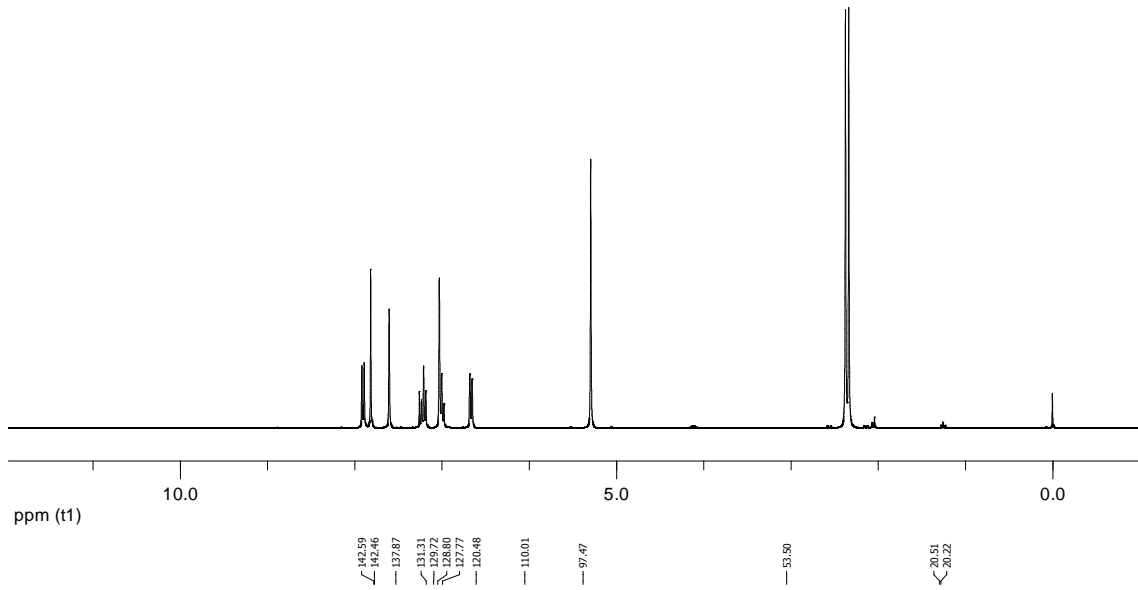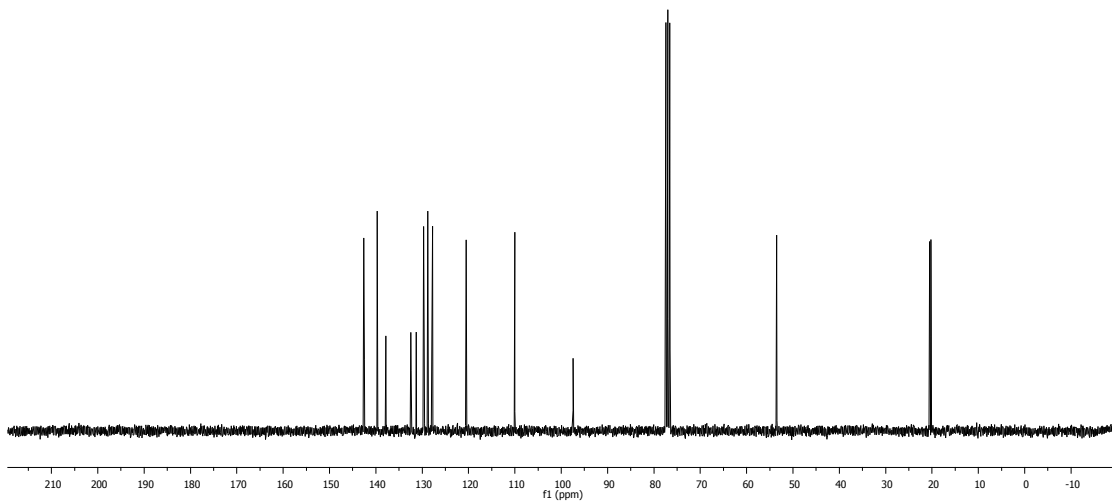

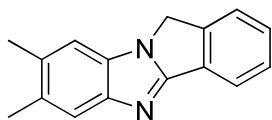

7,8-Dimethyl-11*H*-isoindolo[2,1-*a*]benzimidazole

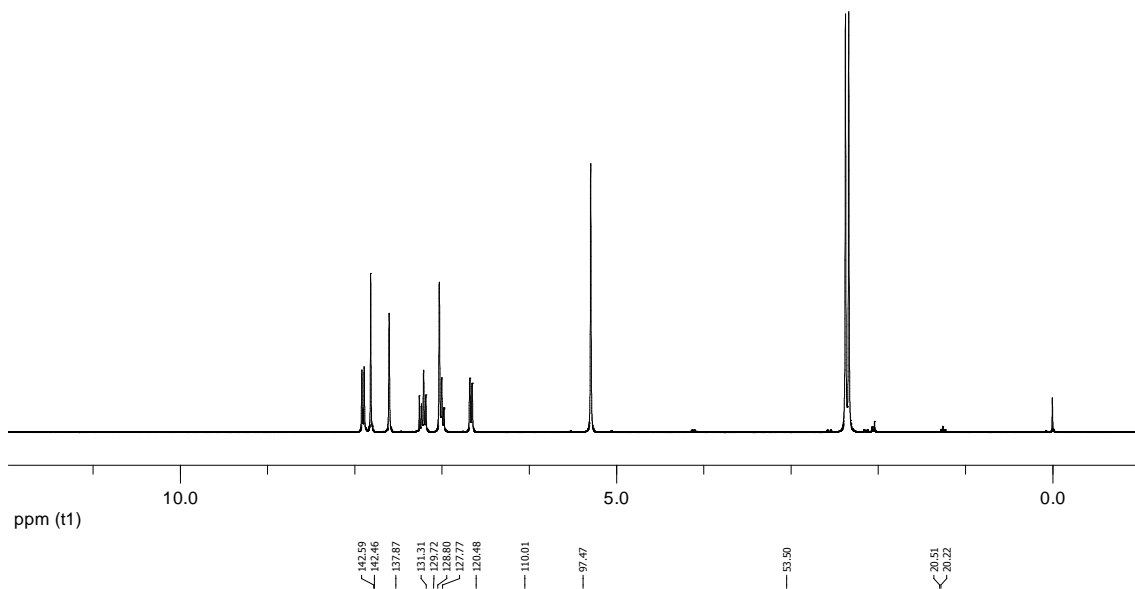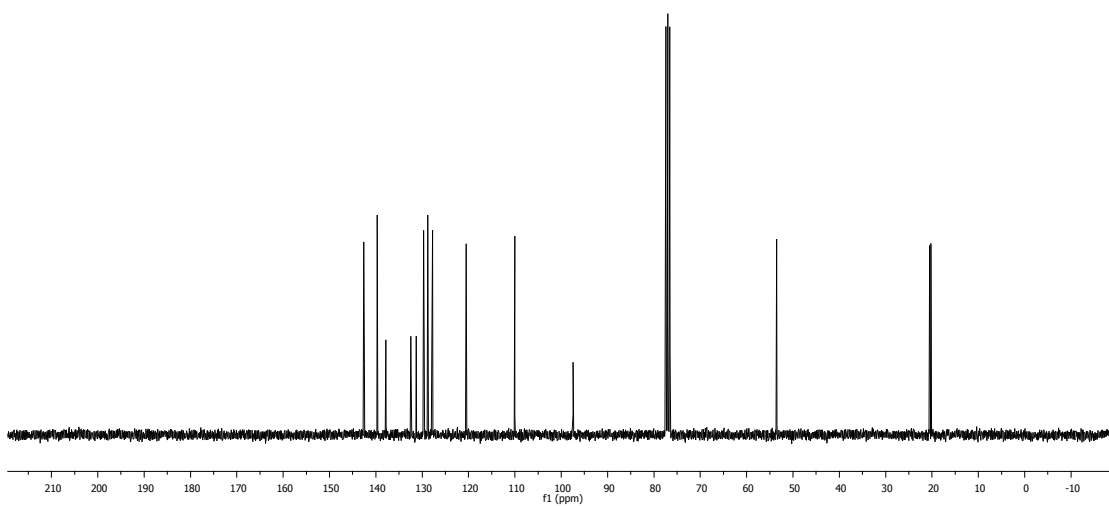



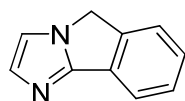

**5H-Imidazo[2,1-a]-isoindole**

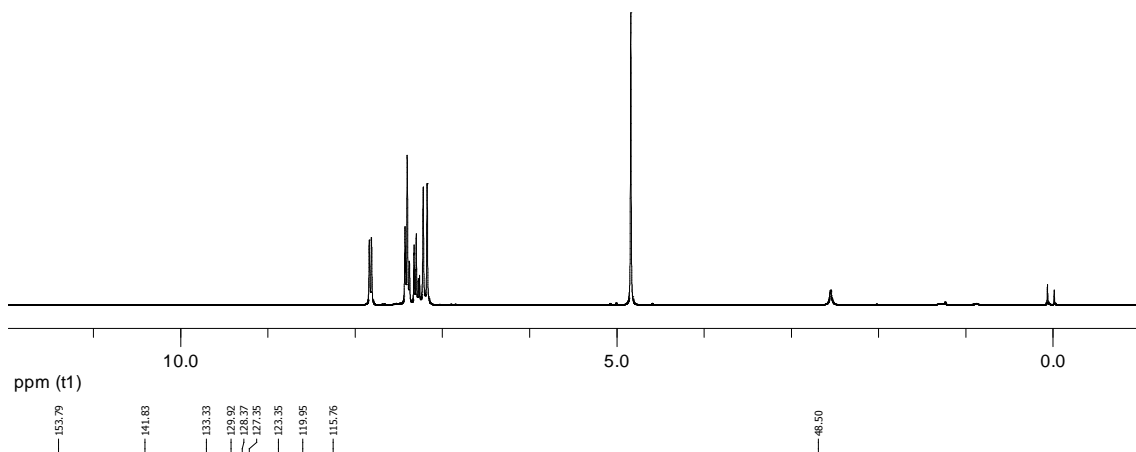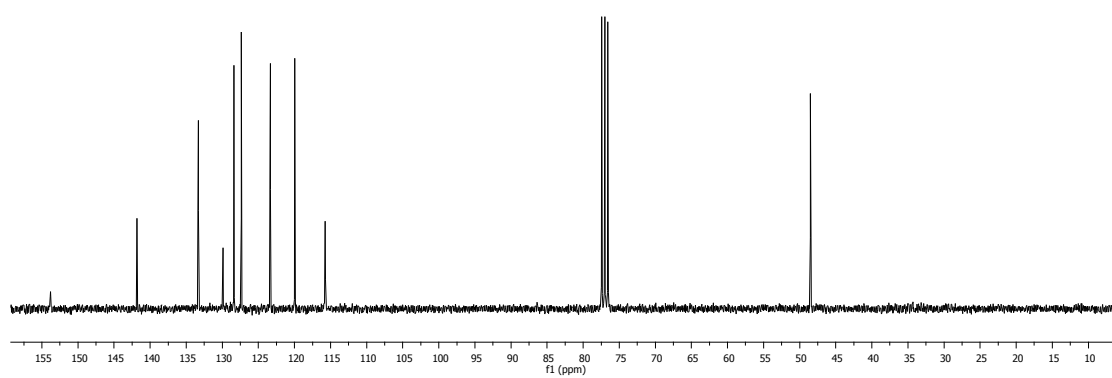



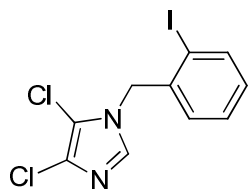

4,5-Dichloro-1-(2-iodobenzyl)-1*H*-imidazole

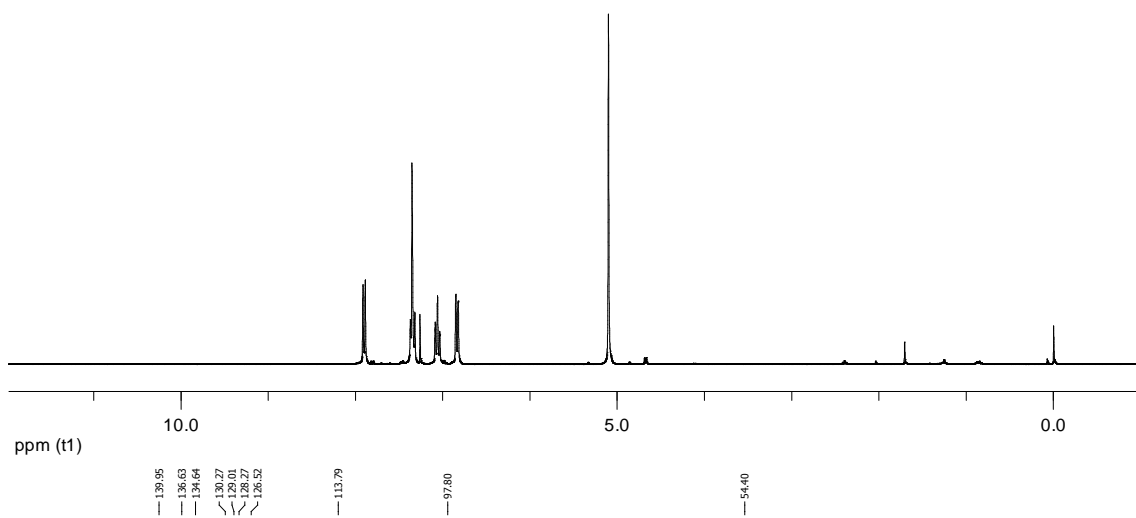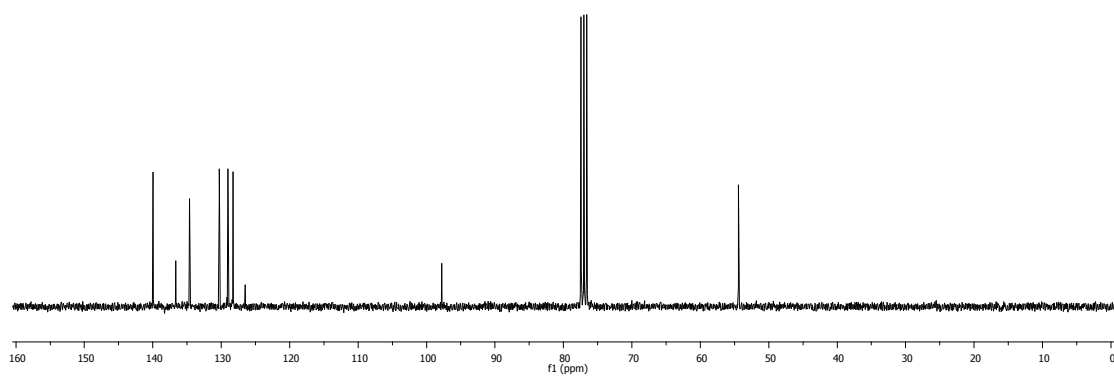

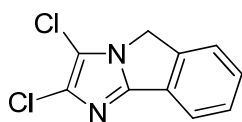

2,3-Dichloro-5*H*-imidazo[2,1-*a*]-isoindole

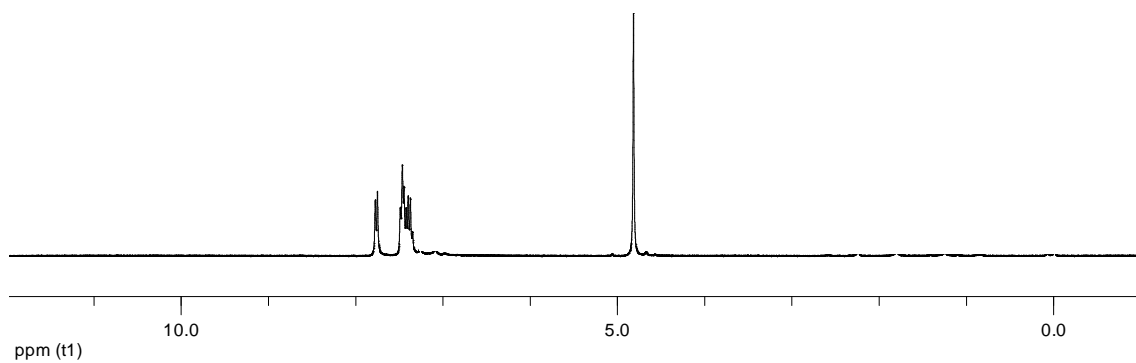

140.27  
140.21  
128.15  
128.81  
128.76  
128.16  
123.52  
119.95  
111.16  
48.82

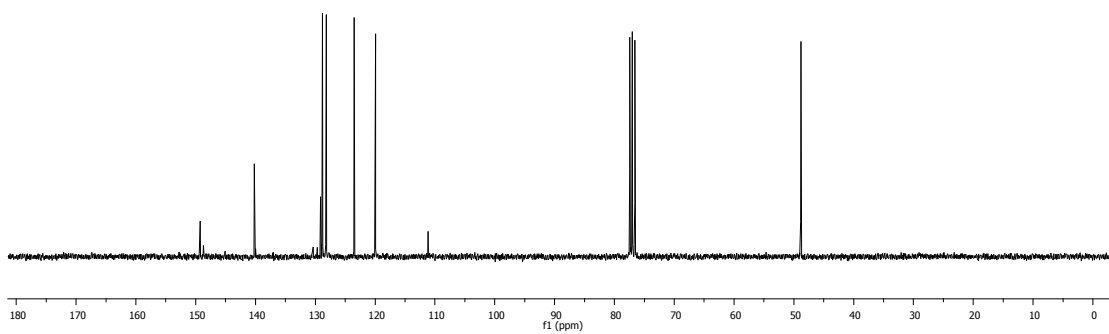

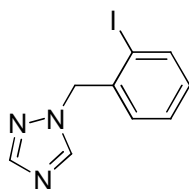

1-(2-Iodobenzyl)-1H-1,2,4-triazole

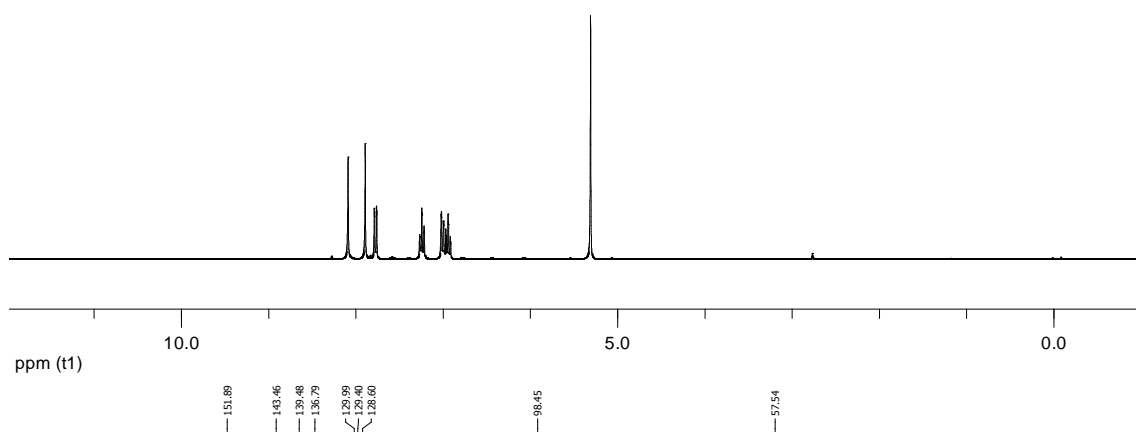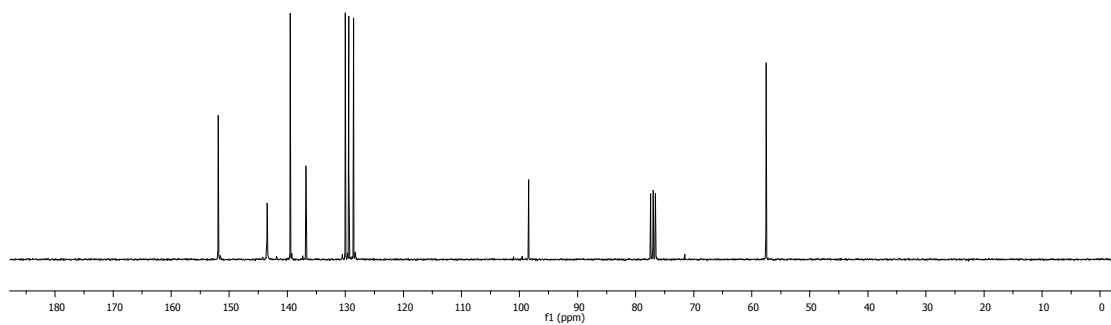

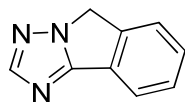

**5H-[1,2,4]triazolo[5,1-a]isoindole**

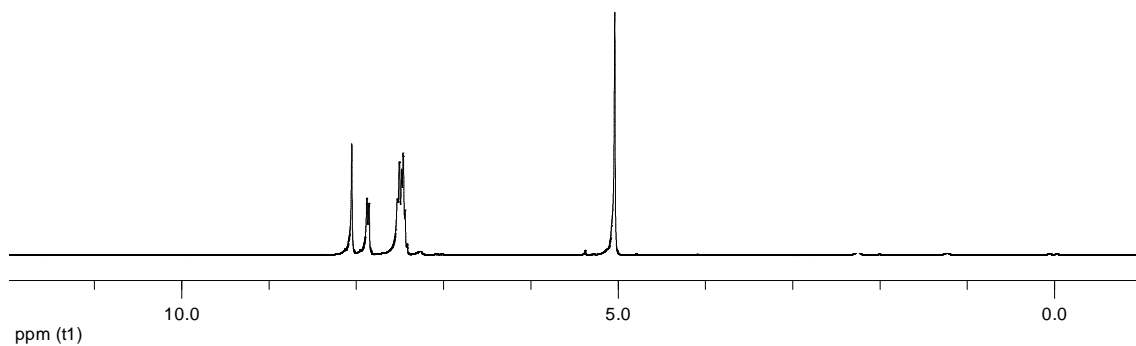

160.11  
155.97  
141.95  
128.30  
127.62  
127.09  
123.86  
121.42  
49.99

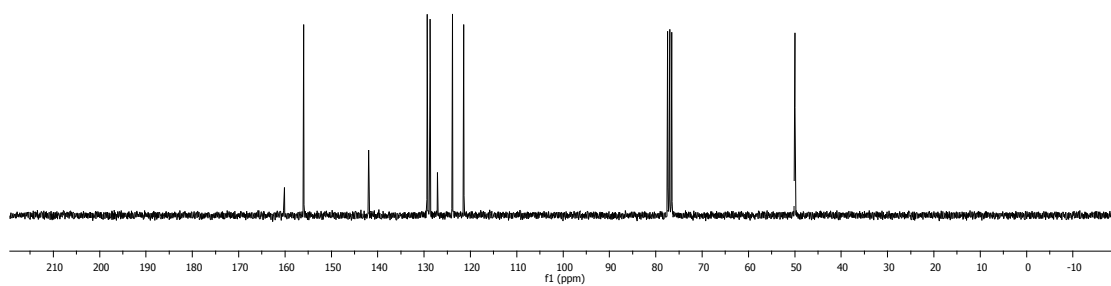

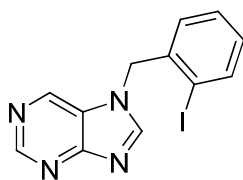

7-(2-Iodobenzyl)-7H-purine

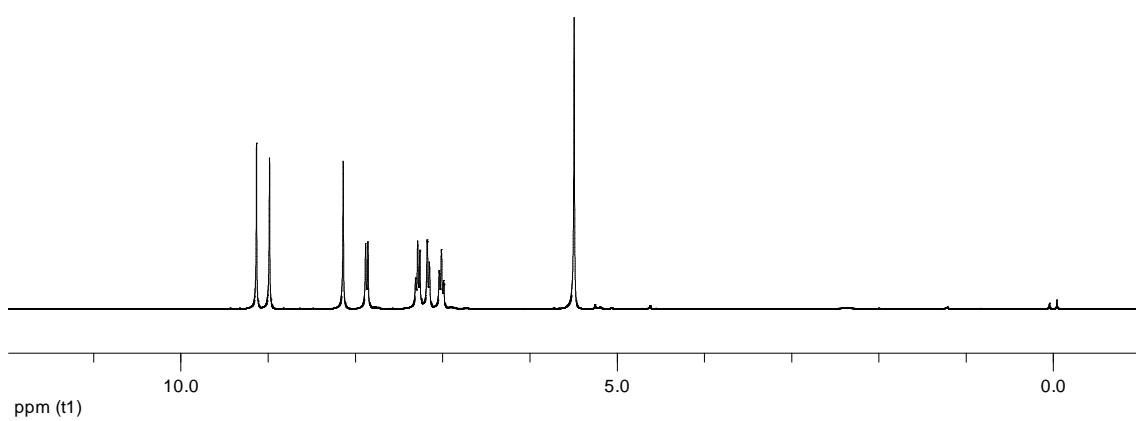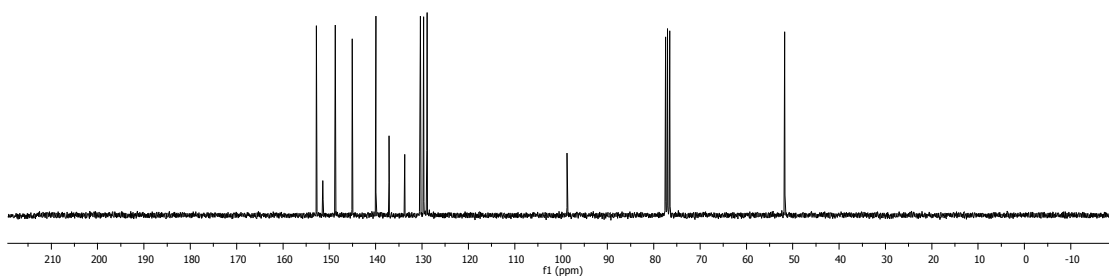

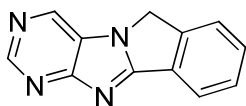

6H-Isoindolo[2,1-f]purine

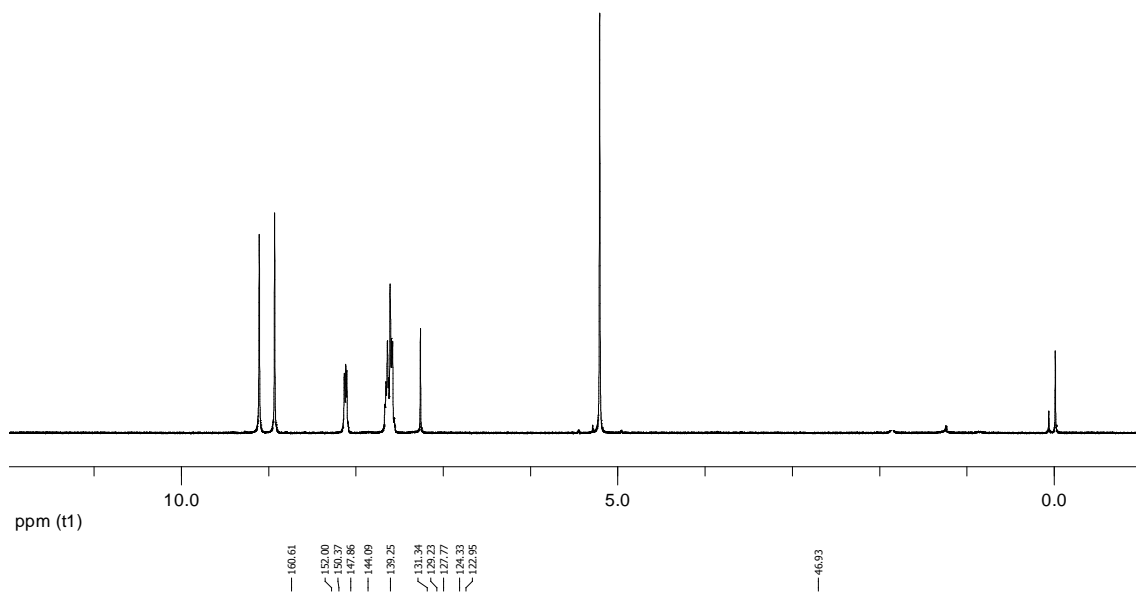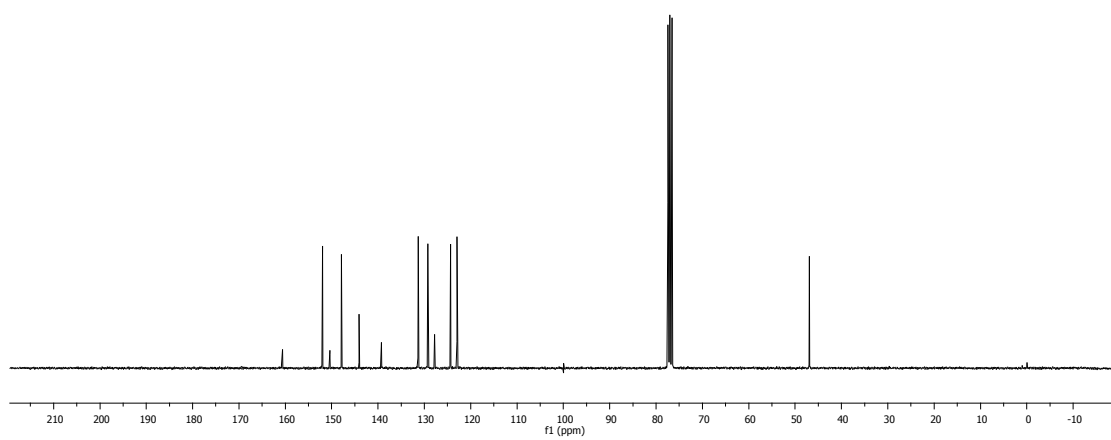

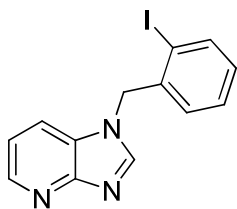

**1-(2-Iodobenzyl)-1*H*-imidazo[4,5-*b*]pyridine**

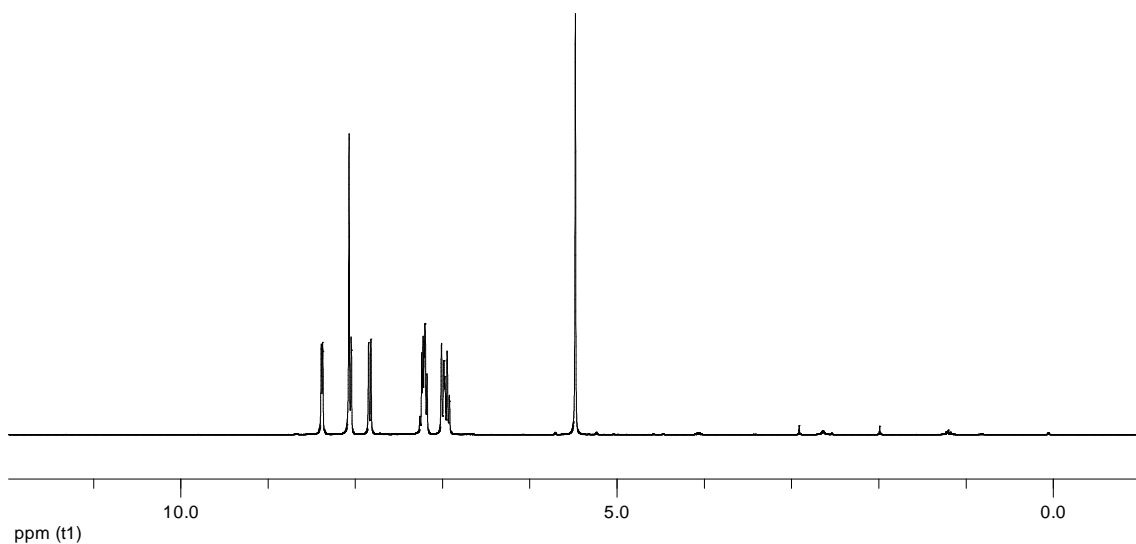

146.89  
144.40  
143.84  
139.65  
137.94  
135.03  
129.79  
128.62  
128.67  
127.93  
118.36

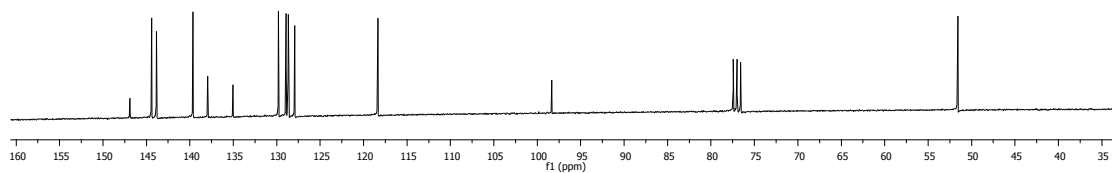

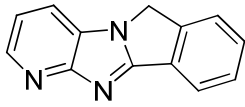

6*H*-Pyrido[2',3',4,5]imidazo[2,1-*a*]isoindole

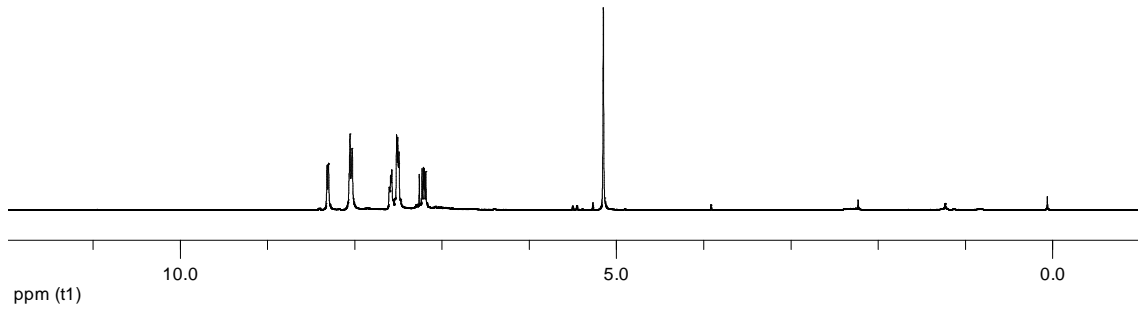

166.42  
144.13  
142.58  
139.76  
139.11  
132.34  
131.16  
128.32  
125.87  
125.40  
120.46  
115.28  
92.29

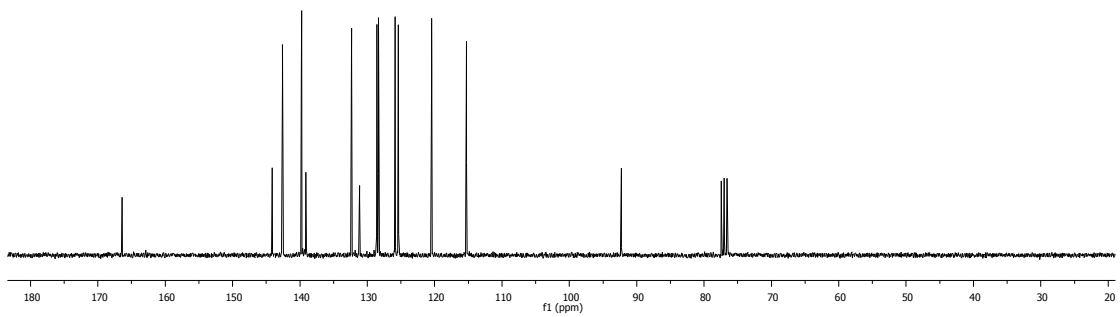



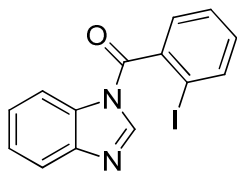

(1*H*-Benzo[d]imidazol-1-yl)(2-iodophenyl)methanone

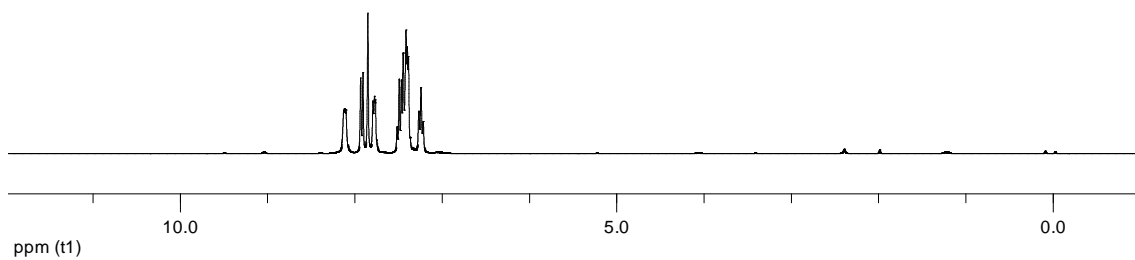

166.42  
144.13  
142.58  
139.76  
139.11  
132.94  
131.16  
128.32  
125.87  
125.40  
120.46  
115.28  
92.29

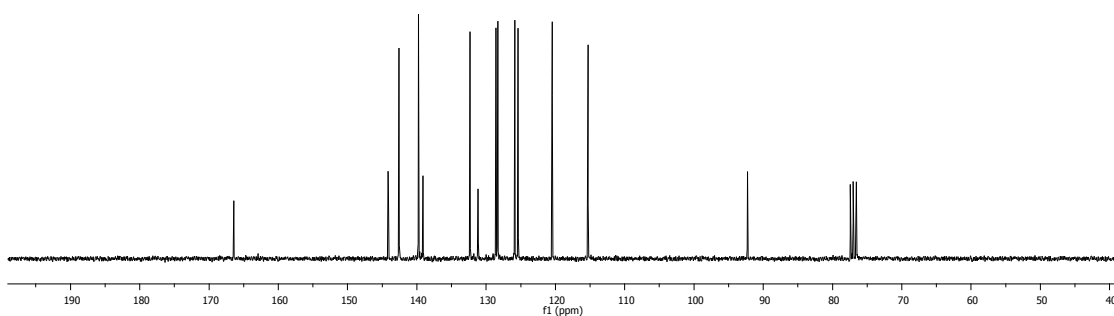

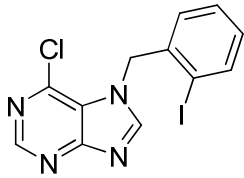

**6-Chloro-7-(2-iodobenzyl)-7H-purine**

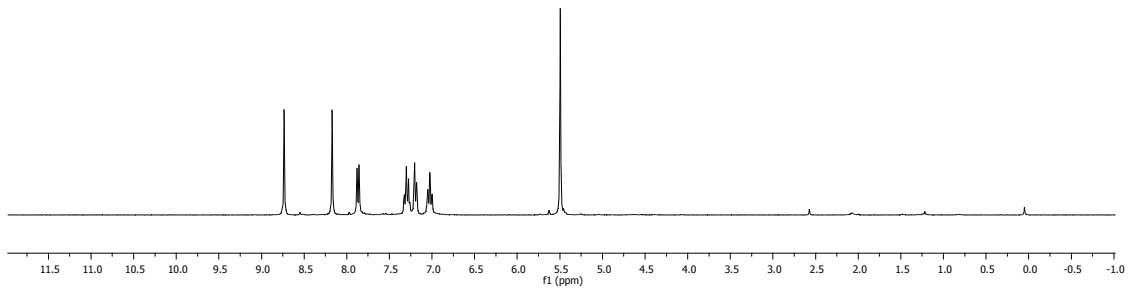

152.15  
151.95  
151.16  
145.13  
140.13  
136.79  
131.43  
130.62  
129.88  
129.07

98.83

52.48

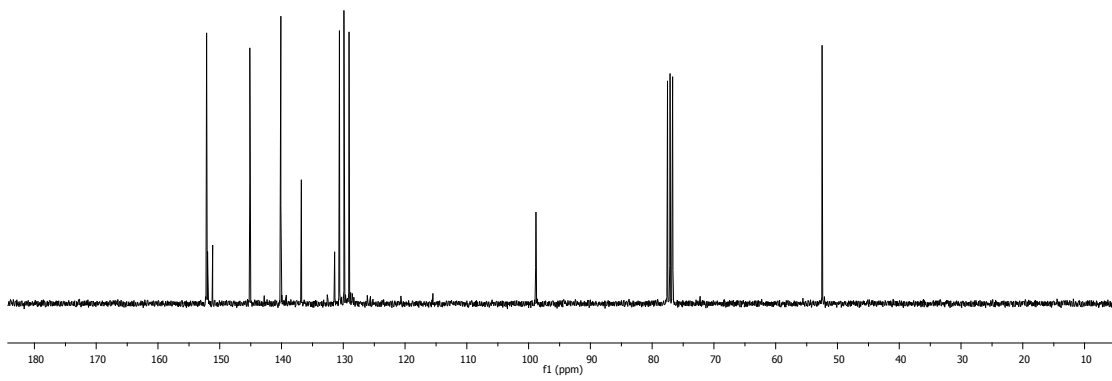



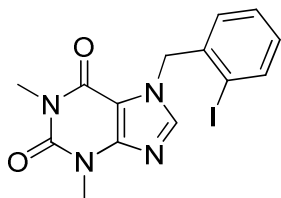

7-(2-Iodobenzyl)-1,3-dimethyl-1*H*-purine-2,6(3*H*,7*H*)-dione

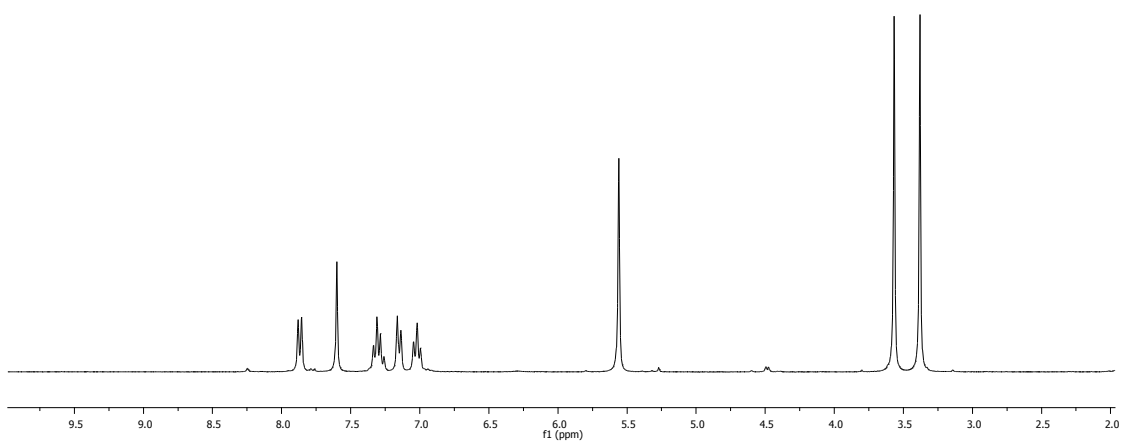

155.17  
151.53  
148.72  
141.09  
138.89  
137.63  
130.28  
129.33  
128.99  
106.91  
98.68  
54.55  
29.73  
27.95

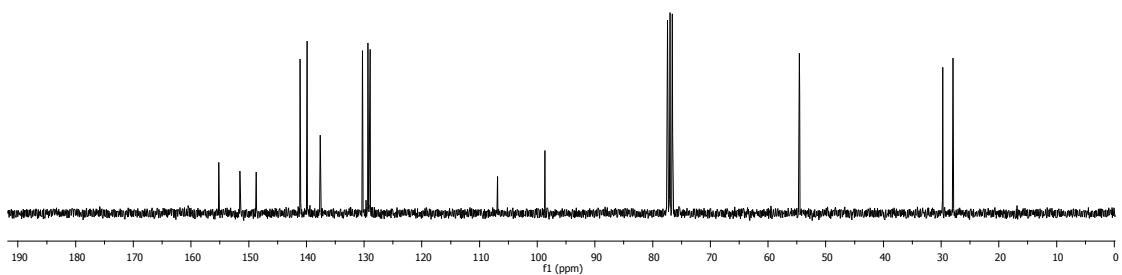

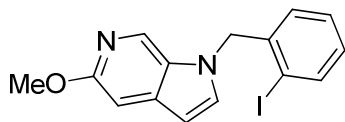

*N*-(2-Iodobenzyl)-5-methoxy-1*H*-pyrrolo[2,3-*c*]pyridine

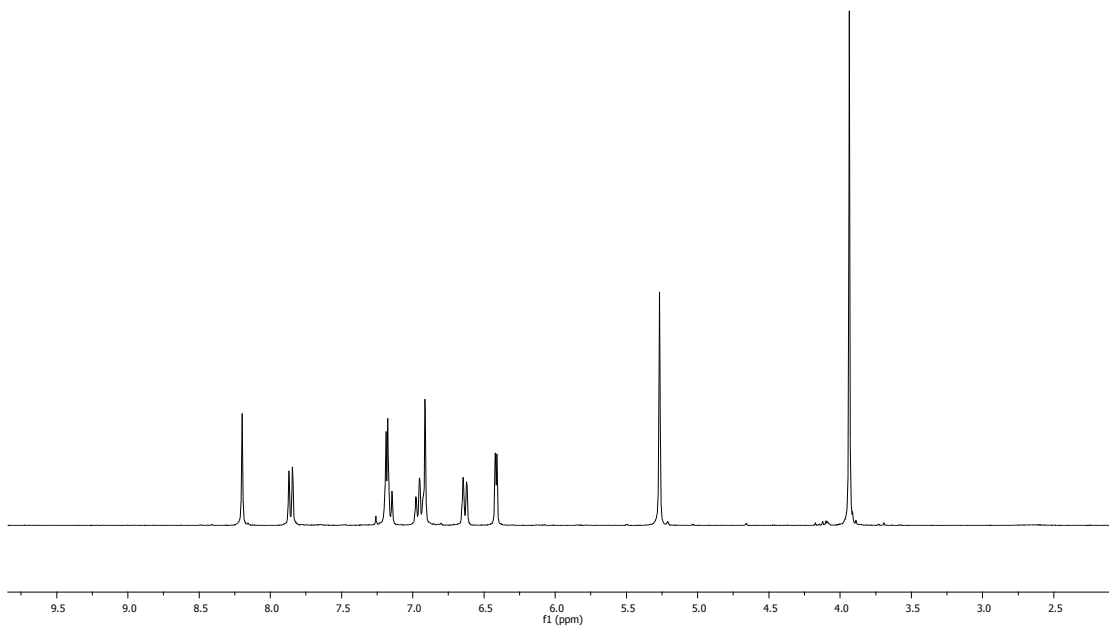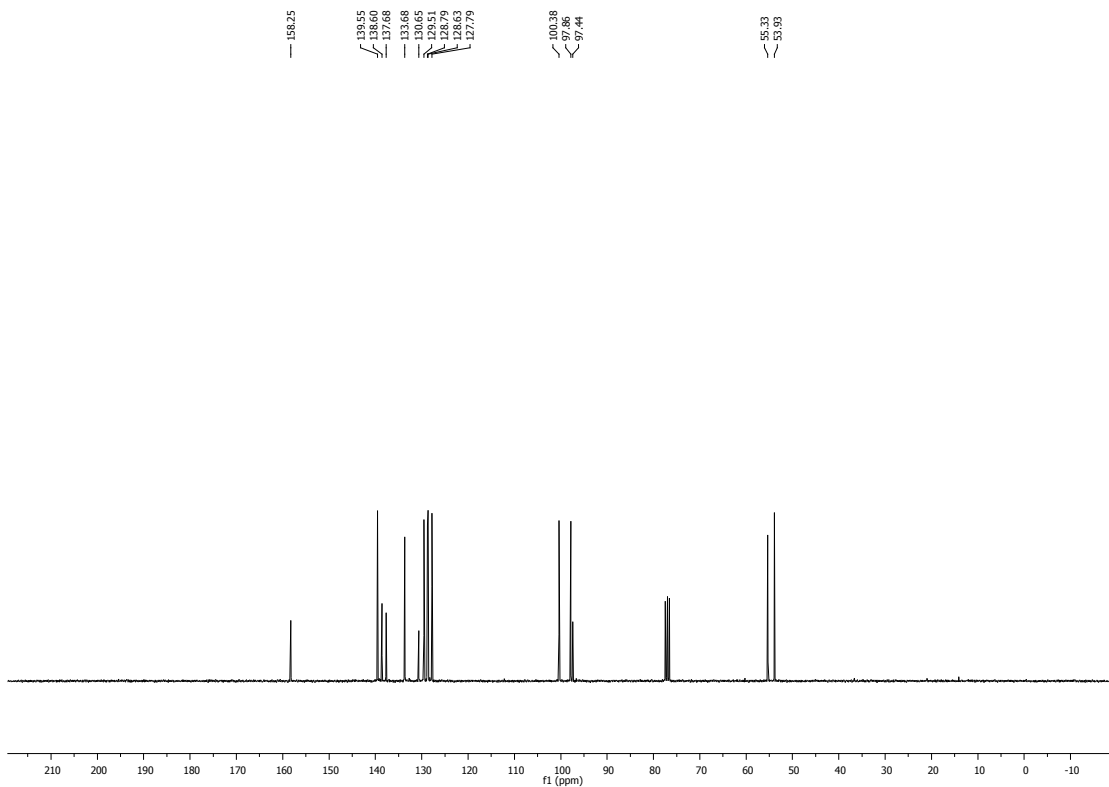

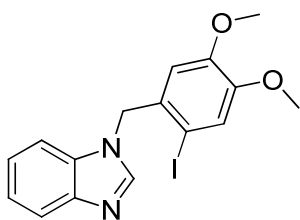

1-(2-Iodo-4,5-dimethoxybenzyl)-1*H*-benzo[*d*]imidazole

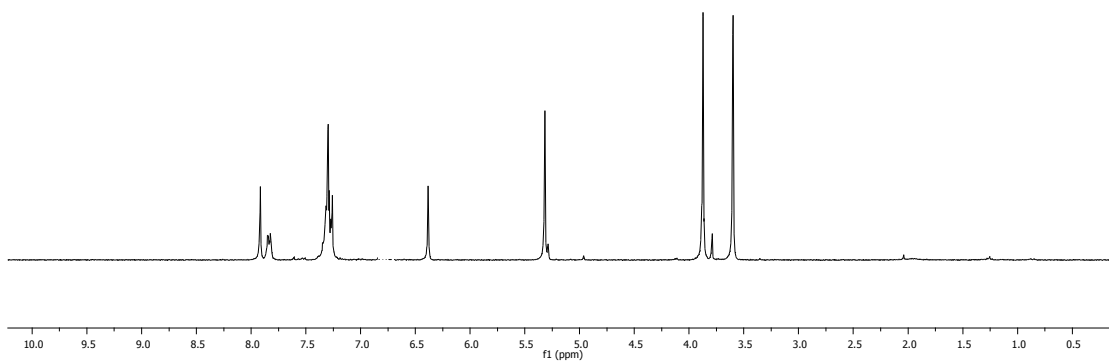

149.76  
149.46  
143.67  
143.04  
133.71  
128.60  
123.14  
122.36  
120.35  
111.29  
110.03  
86.37  
56.16  
55.78  
53.33

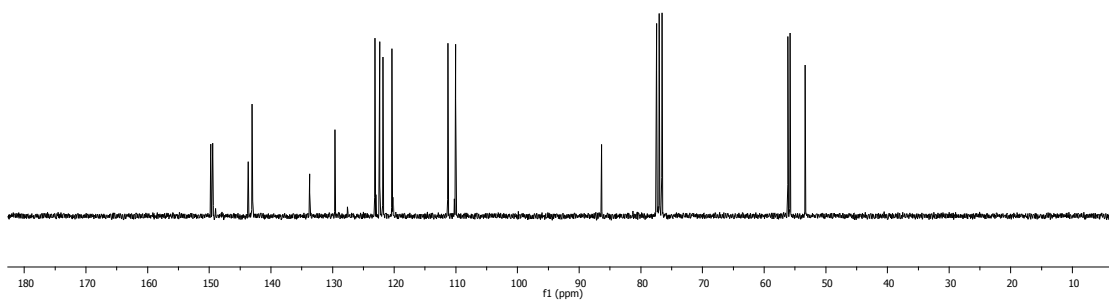

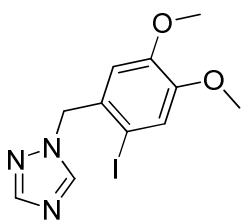

1-(2-Iodo-4,5-dimethoxybenzyl)-1H-1,2,4-triazole

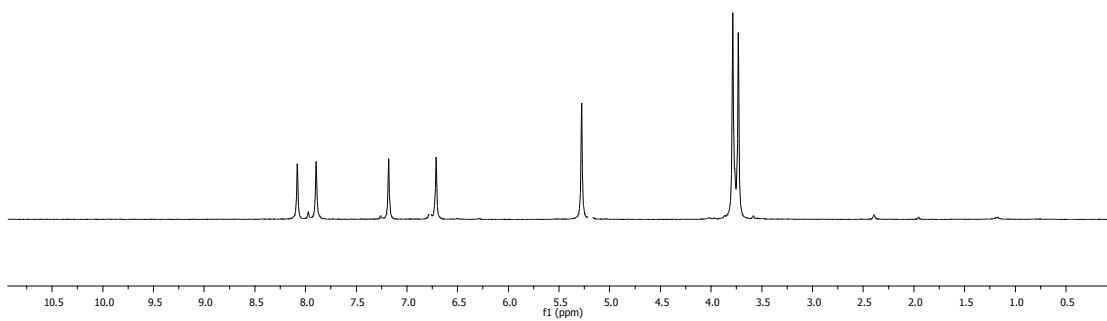

151.08  
149.88  
149.53  
143.19  
129.08  
121.53  
112.63  
87.26  
57.48  
56.01  
55.77

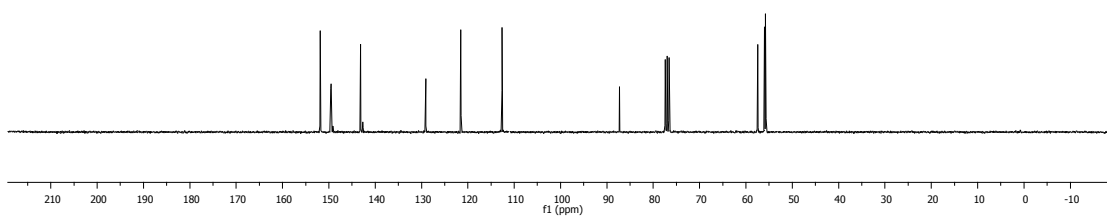

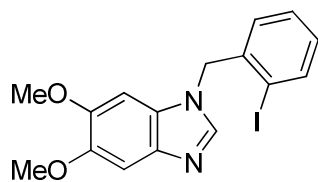

**1-(2-Iodobenzyl)-5,6-dimethoxy-1*H*-benzo[d]imidazole**

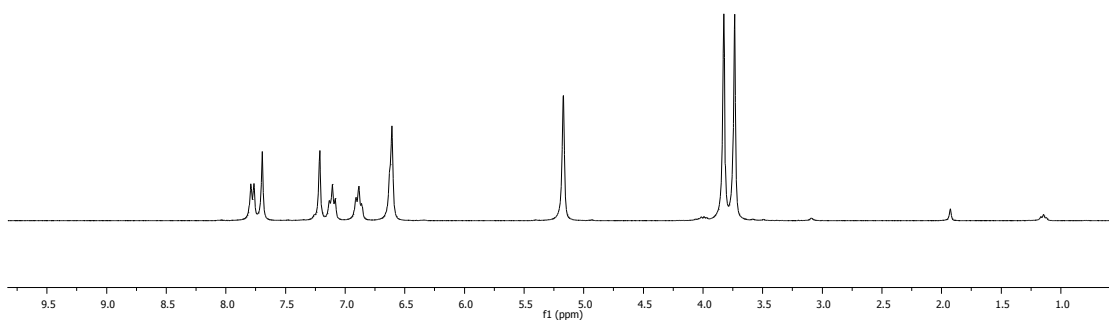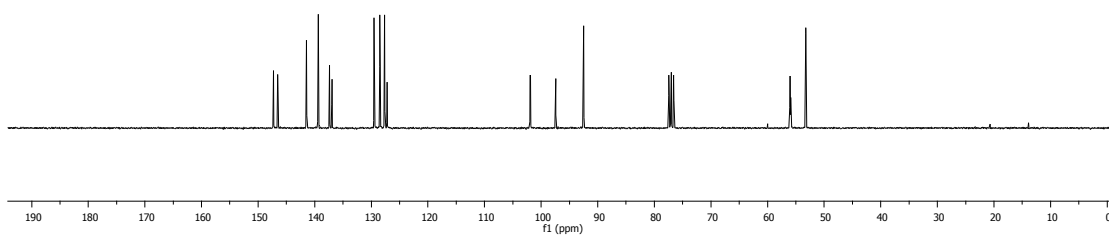



<sup>1</sup> R. Sanz, J. M. Ignacio, M. P. Castroviejo,; Fañanas, F. J. *Arkivok* 2007, 84-91.

<sup>2</sup> N. Arai,; M. Takahashi, M. Mitani, A.Mori, *Synlett* 2006, 3170-3172.
